# Supplementary material for: Individual and Interactive Effects of Nitrogen and Phosphorus on Drought Stress Response and Recovery in Maize Seedlings
Source: MDPI journal article supplement (doi:10.3390/agriculture13030654), 2023-03-10
Supplement: s1 [file s1]

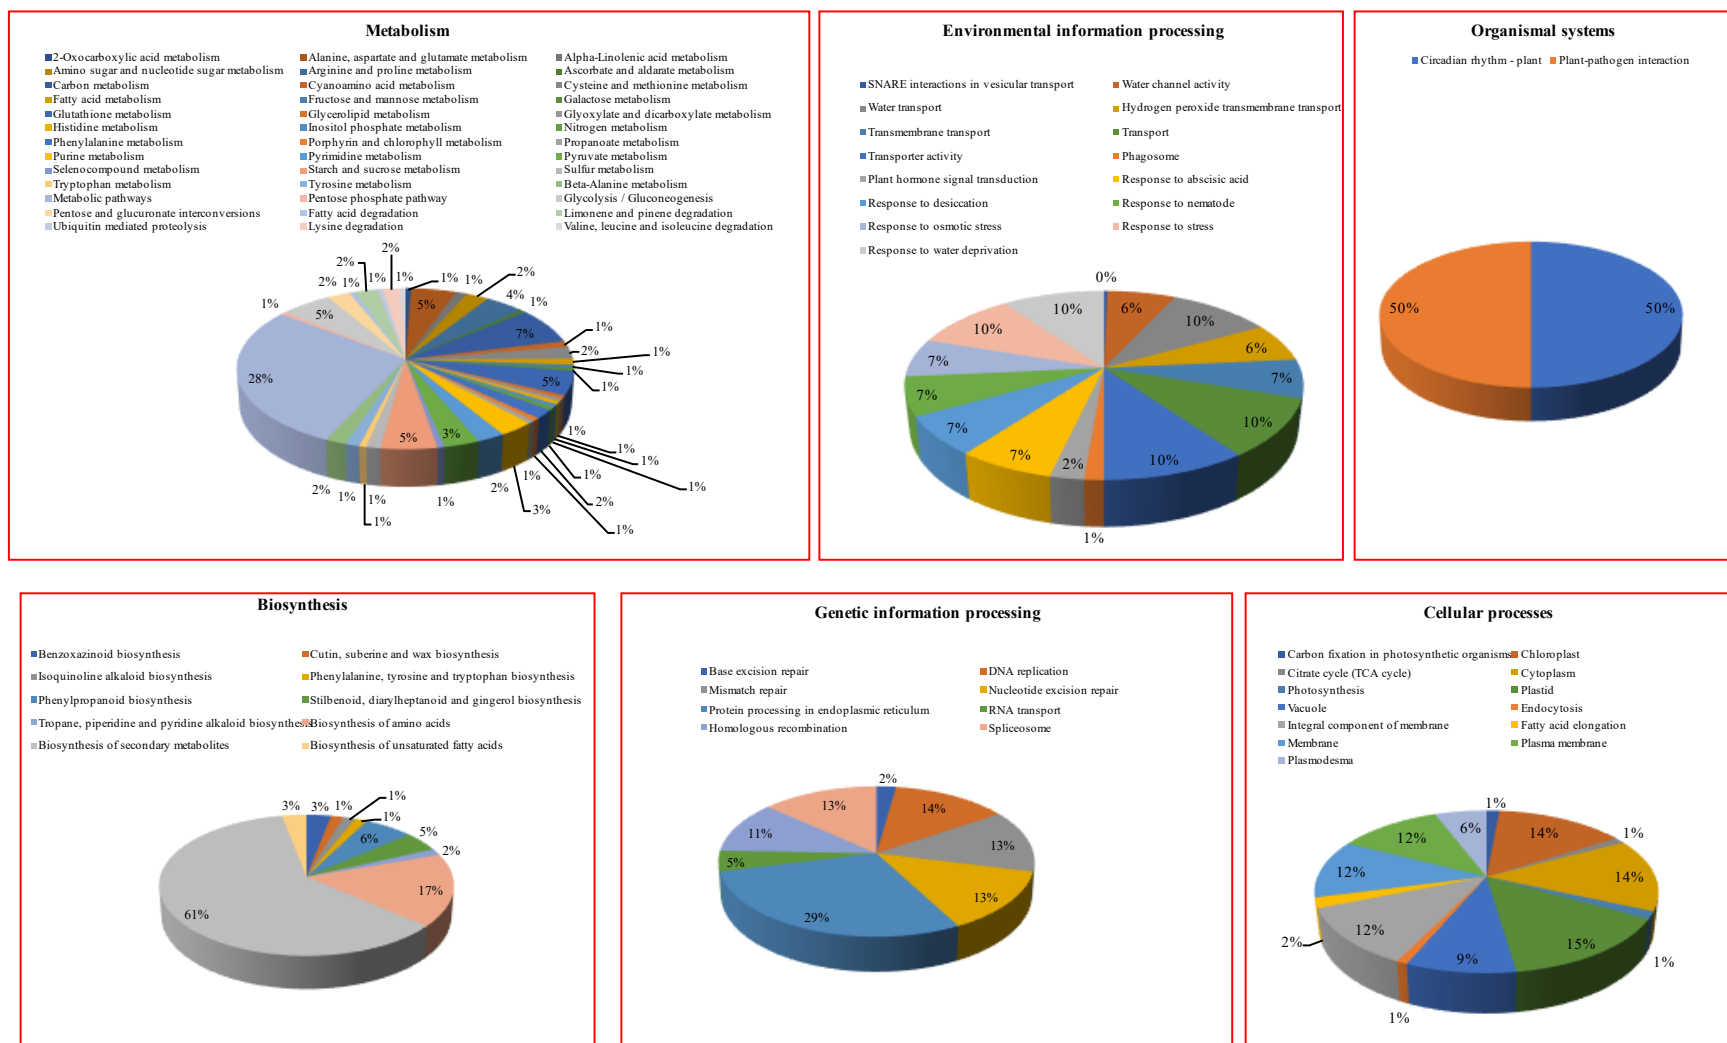

Supplementary Figure S1: KEGG enrichment analysis of drought responsive DEGs in maize, 3-fold change
